# Supplementary material for: Proteomic Investigation of Cape Cobra (Naja nivea) Venom Reveals First Evidence of Quaternary Protein Structures
Source: MDPI journal article supplement (doi:10.3390/toxins16020063), 2024-01-23
Supplement: s1 [file s1]

# Supplementary material Proteomic Investigation of Cape Cobra (*Naja nivea*) Venom Reveals First Evidence of Quaternary Protein Structures

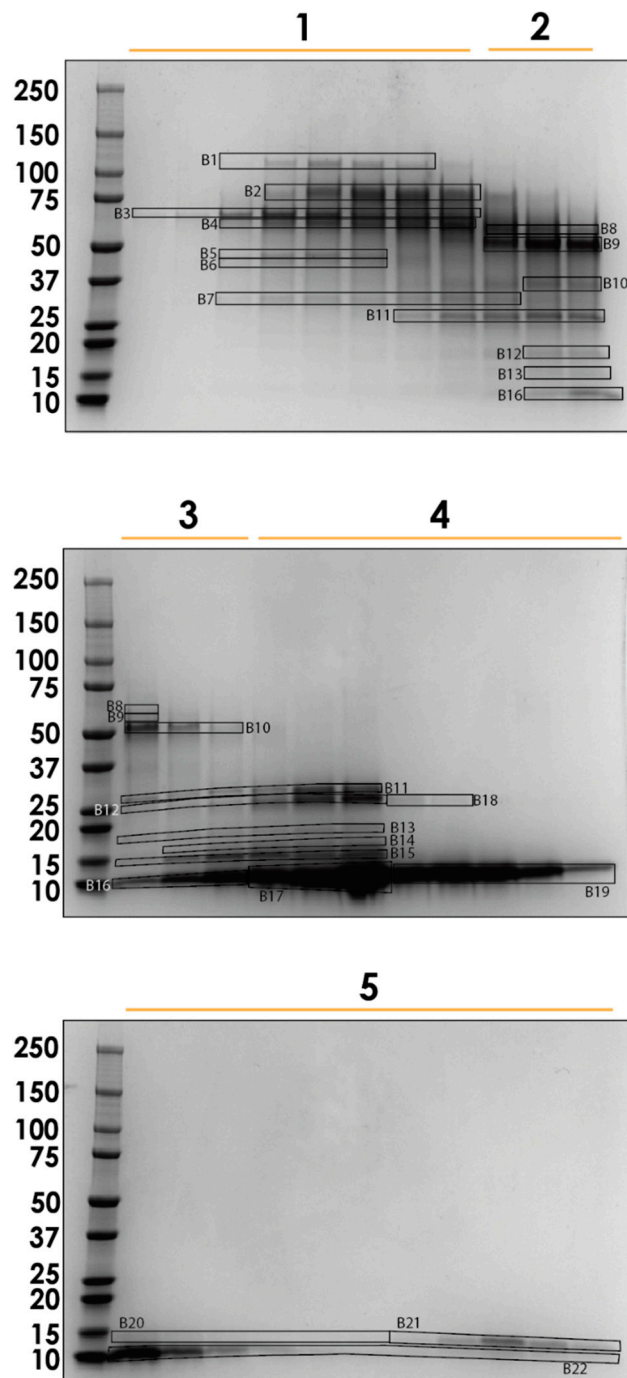

**Figure S1:** Annotated gels showing bands that were combined for in-gel digestion.

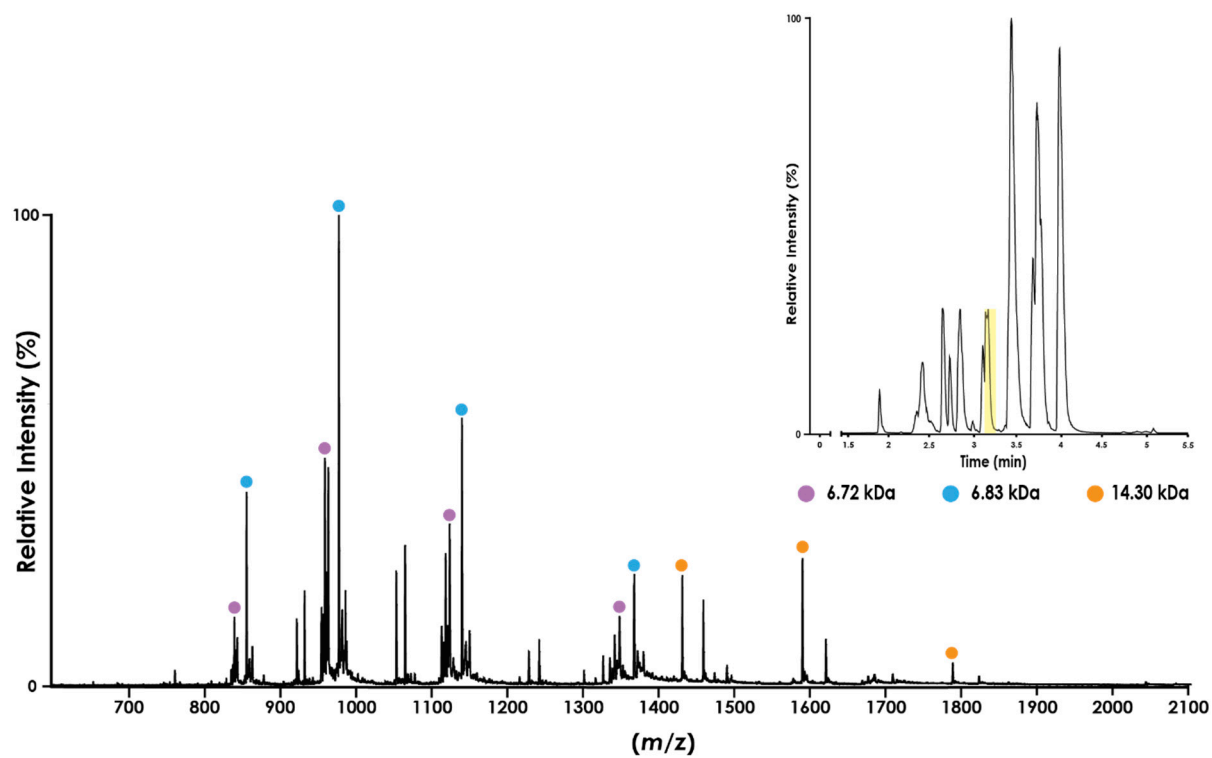

**Figure S2:** Mass spectrum extracted from the chromatogram at 3.24 min. Charge states for each species of interest are denoted by coloured circles, and their corresponding deconvoluted mass is given.

**Table S1:** Proteins identified from *N. nivea* venom fractions using LC-MS/MS. Relative abundance is calculated using normalised spectral abundance factors as outlined in the methods.

| Band 1      |                 |                |        |             |                        |                |           |
|-------------|-----------------|----------------|--------|-------------|------------------------|----------------|-----------|
| Accession   | Unique peptides | Spectral count | length | SAF         | Relative abundance (%) | protein family | Avg. Mass |
| A0A2D0TC04  | 3               | 16             | 830    | 0.019277108 | 0.14                   | PDE            | 94616     |
| A0A8C6X0L1  | 3               | 16             | 853    | 0.018757327 | 0.14                   | PDE            | 96989     |
| A0A8C6V7L7  | 3               | 16             | 889    | 0.01799775  | 0.13                   | PDE            | 101012    |
| Band 2      |                 |                |        |             |                        |                |           |
| Accession   | Unique peptides | Spectral count |        |             |                        |                | Avg. Mass |
| R4FKE6      | 5               | 4              | 566    | 0.007067138 | 0.05                   | AChE           | 63242     |
| A0A670ZA06  | 5               | 4              | 588    | 0.006802721 | 0.05                   | AChE           | 65198     |
| A0A8C6Y6V0  | 5               | 5              | 547    | 0.009140768 | 0.07                   | AChE           | 60323     |
| A0A8C7E5F6  | 3               | 5              | 581    | 0.008605852 | 0.06                   | AChE           | 65240     |
| A0A8C5S3L4  | 3               | 3              | 655    | 0.004580153 | 0.03                   | AChE           | 73567     |
| A0A2D0TC04  | 2               | 5              | 830    | 0.006024096 | 0.04                   | PDE            | 94616     |
| A0A8C6X0L1  | 2               | 5              | 853    | 0.005861665 | 0.04                   | PDE            | 96989     |
| Band 3      |                 |                |        |             |                        |                |           |
| Accession   | Unique peptides | Spectral count |        |             |                        |                | Avg. Mass |
| Q91132      | 10              | 18             | 1642   | 0.010962241 | 0.08                   | CVF            | 184517    |
| A0A2I4HXH5  | 9               | 16             | 529    | 0.030245747 | 0.23                   | 5'NUC          | 58198     |
| A0A8C6XAL5  | 3               | 16             | 568    | 0.028169014 | 0.21                   | 5'NUC          | 62399     |
| A0A8C7DVS3  | 3               | 16             | 517    | 0.030947776 | 0.23                   | 5'NUC          | 56646     |
| A0A8C6V9N4  | 3               | 12             | 514    | 0.023346304 | 0.17                   | LAAO           | 58792     |
| A0A670ZA06  | 3               | 9              | 588    | 0.015306122 | 0.11                   | AChE           | 65198     |
| A0A8C6Y6V0  | 3               | 9              | 547    | 0.016453382 | 0.12                   | AChE           | 60323     |
| A0A8C7E5F6  | 3               | 9              | 581    | 0.015490534 | 0.12                   | AChE           | 65240     |
| Q92035      | 3               | 6              | 606    | 0.00990099  | 0.07                   | AChE           | 68074     |
| A0A8C5S3L4  | 2               | 6              | 655    | 0.009160305 | 0.07                   | AChE           | 73567     |
| R4FJM1      | 2               | 6              | 545    | 0.011009174 | 0.08                   | AChE           | 60425     |
| D3TTC1      | 2               | 3              | 593    | 0.005059022 | 0.04                   | SVMP           | 66292     |
| D6PXE8      | 2               | 3              | 593    | 0.005059022 | 0.04                   | SVMP           | 66246     |
| A0A0A1WCE4  | 2               | 3              | 513    | 0.005847953 | 0.04                   | AChE           | 57649     |
| A0A023V VX3 | 2               | 3              | 513    | 0.005847953 | 0.04                   | AChE           | 57630     |
| A0A098LYB5  | 2               | 3              | 576    | 0.005208333 | 0.04                   | AChE           | 64762     |
| A0A346CLZ4  | 2               | 3              | 605    | 0.004958678 | 0.04                   | AChE           | 68520     |
| A0A098LYD4  | 2               | 3              | 605    | 0.004958678 | 0.04                   | AChE           | 68695     |
| A0A023V WS2 | 2               | 3              | 608    | 0.004934211 | 0.04                   | AChE           | 68986     |
| A0A0A1WDT1  | 2               | 3              | 608    | 0.004934211 | 0.04                   | AChE           | 69005     |
| R4FID0      | 2               | 3              | 542    | 0.005535055 | 0.04                   | LAAO           | 61568     |
| A0A8C7E3Y2  | 2               | 4              | 1179   | 0.003392706 | 0.03                   | CVF            | 132933    |
| A0A8C6Y1E6  | 2               | 4              | 1203   | 0.003325021 | 0.02                   | CVF            | 135417    |
| A0A8C6Y1Y9  | 2               | 4              | 1215   | 0.003292181 | 0.02                   | CVF            | 136664    |

| A0A8C6Y3T6 | 2               | 4              | 1221 | 0.003276003 | 0.02 | CVF   | 137551    |
|------------|-----------------|----------------|------|-------------|------|-------|-----------|
| A0A8C6Y2G7 | 2               | 4              | 1240 | 0.003225806 | 0.02 | CVF   | 139848    |
| A0A8C7E4H5 | 2               | 4              | 1254 | 0.003189793 | 0.02 | CVF   | 141014    |
| A8QL52     | 2               | 5              | 517  | 0.00967118  | 0.07 | LAAO  | 58764     |
| A8QL51     | 2               | 5              | 517  | 0.00967118  | 0.07 | LAAO  | 58811     |
| A0A098LY86 | 2               | 3              | 401  | 0.007481297 | 0.06 | AChE  | 45999     |
| Band 4     |                 |                |      |             |      |       |           |
| Accession  | Unique peptides | Spectral count |      |             |      |       | Avg. Mass |
| Q91132     | 13              | 28             | 1642 | 0.017052375 | 0.13 | CVF   | 184517    |
| A0A2I4HXH5 | 6               | 24             | 529  | 0.04536862  | 0.34 | 5'NUC | 58198     |
| A0A8C6XAL5 | 4               | 25             | 568  | 0.044014085 | 0.33 | 5'NUC | 62399     |
| A0A8C7DVS3 | 4               | 25             | 517  | 0.048355899 | 0.36 | 5'NUC | 56646     |
| A0A8C6V9N4 | 2               | 9              | 514  | 0.017509728 | 0.13 | LAAO  | 58792     |
| A0A8C6Y6V0 | 2               | 9              | 547  | 0.016453382 | 0.12 | AChE  | 60323     |
| A0A8C7E5F6 | 2               | 9              | 581  | 0.015490534 | 0.12 | AChE  | 65240     |
| A0A8C7E3Y2 | 2               | 10             | 1179 | 0.008481764 | 0.06 | CVF   | 132933    |
| A0A8C6Y1E6 | 2               | 10             | 1203 | 0.008312552 | 0.06 | CVF   | 135417    |
| A0A8C6Y1Y9 | 2               | 10             | 1215 | 0.008230453 | 0.06 | CVF   | 136664    |
| A0A8C6Y3T6 | 2               | 10             | 1221 | 0.008190008 | 0.06 | CVF   | 137551    |
| A0A8C6Y2G7 | 2               | 10             | 1240 | 0.008064516 | 0.06 | CVF   | 139848    |
| A0A8C7E4H5 | 2               | 10             | 1254 | 0.007974482 | 0.06 | CVF   | 141014    |
| Band 5     |                 |                |      |             |      |       |           |
| Accession  | Unique peptides | Spectral count |      |             |      |       | Avg. Mass |
| Q91132     | 2               | 15             | 1642 | 0.009135201 | 0.07 | CVF   | 184517    |
| A0A8C6Y1Y9 | 2               | 14             | 1215 | 0.011522634 | 0.09 | CVF   | 136664    |
| A0A8C7E4H5 | 2               | 14             | 1254 | 0.011164274 | 0.08 | CVF   | 141014    |
| V8NRX1     | 2               | 2              | 462  | 0.004329004 | 0.03 | house | 51876     |
| A0A8C6X610 | 2               | 2              | 483  | 0.004140787 | 0.03 | house | 53183     |
| A0A6B2F5Z9 | 2               | 2              | 486  | 0.004115226 | 0.03 | house | 53578     |
| A0A8C5S523 | 2               | 2              | 460  | 0.004347826 | 0.03 | house | 50716     |
| Band 6     |                 |                |      |             |      |       |           |
| Accession  | Unique peptides | Spectral count |      |             |      |       | Avg. Mass |
| Q91132     | 2               | 14             | 1642 | 0.008526188 | 0.06 | CVF   | 184517    |
| Band 7     |                 |                |      |             |      |       |           |
| Accession  | Unique peptides | Spectral count |      |             |      |       | Avg. Mass |
| Q91132     | 3               | 21             | 1642 | 0.012789281 | 0.10 | CVF   | 184517    |
| A0A8C6Y1E6 | 3               | 20             | 1203 | 0.016625104 | 0.12 | CVF   | 135417    |
| A0A8C6Y1Y9 | 3               | 20             | 1215 | 0.016460905 | 0.12 | CVF   | 136664    |
| A0A8C6Y2G7 | 3               | 20             | 1240 | 0.016129032 | 0.12 | CVF   | 139848    |
| A0A8C7E4H5 | 3               | 20             | 1254 | 0.015948963 | 0.12 | CVF   | 141014    |
| A0A8C7E3Y2 | 3               | 19             | 1179 | 0.016115352 | 0.12 | CVF   | 132933    |

| Band 8                    |                 |                |     |             |      |         |           |
|---------------------------|-----------------|----------------|-----|-------------|------|---------|-----------|
| no hits > 1<br>unique pep |                 |                |     |             |      |         |           |
| Band 9                    |                 |                |     |             |      |         |           |
| Accession                 | Unique peptides | Spectral count |     |             |      |         | Avg. Mass |
| D3TTC2                    | 2               | 10             | 613 | 0.016313214 | 0.12 | SVMP    | 69181     |
| A0A8C6XIQ9                | 2               | 9              | 614 | 0.01465798  | 0.11 | unknown | 68844     |
| A0A8C6XLA9                | 2               | 9              | 614 | 0.01465798  | 0.11 | unknown | 69048     |
| A0A8C6XJV4                | 2               | 9              | 614 | 0.01465798  | 0.11 | unknown | 68942     |
| Band 10                   |                 |                |     |             |      |         |           |
| Accession                 | Unique peptides | Spectral count |     |             |      |         | Avg. Mass |
| D3TTC2                    | 2               | 3              | 613 | 0.004893964 | 0.04 | SVMP    | 69181     |
| A0A8C6XIT1                | 2               | 3              | 614 | 0.004885993 | 0.04 | unknown | 68936     |
| A0A8C6XIQ9                | 2               | 3              | 614 | 0.004885993 | 0.04 | unknown | 68844     |
| A0A8C6XLA9                | 2               | 3              | 614 | 0.004885993 | 0.04 | unknown | 69048     |
| A0A8C6XJV4                | 2               | 3              | 614 | 0.004885993 | 0.04 | unknown | 68942     |
| A0A6B2F5Z9                | 2               | 2              | 486 | 0.004115226 | 0.03 | house   | 53578     |
| V8NRX1                    | 2               | 2              | 462 | 0.004329004 | 0.03 | house   | 51876     |
| A0A8C6X610                | 2               | 2              | 483 | 0.004140787 | 0.03 | house   | 53183     |
| A0A670Z4J3                | 2               | 3              | 508 | 0.005905512 | 0.04 | house   | 55607     |
| P01456                    | 2               | 4              | 60  | 0.066666667 | 0.50 | 3FTx    | 6697      |
| P01455                    | 2               | 4              | 60  | 0.066666667 | 0.50 | 3FTx    | 6696      |
| A0A8C6Y570                | 2               | 1              | 317 | 0.003154574 | 0.02 | SVSP    | 34594     |
| A0A670YN01                | 2               | 1              | 356 | 0.002808989 | 0.02 | SVSP    | 38378     |
| A0A8C6XBU8                | 2               | 1              | 454 | 0.002202643 | 0.02 | house   | 50316     |
| P01462                    | 2               | 4              | 60  | 0.066666667 | 0.50 | 3FTx    | 6858      |
| P01464                    | 2               | 4              | 60  | 0.066666667 | 0.50 | 3FTx    | 6856      |
| P01465                    | 2               | 4              | 60  | 0.066666667 | 0.50 | 3FTx    | 6857      |
| P01466                    | 2               | 4              | 60  | 0.066666667 | 0.50 | 3FTx    | 6856      |
| A0A8C6X0T5                | 2               | 1              | 149 | 0.006711409 | 0.05 | house   | 15926     |
| D5LMJ3                    | 2               | 1              | 607 | 0.001647446 | 0.01 | SVMP    | 68254     |
| Band 11                   |                 |                |     |             |      |         |           |
| Accession                 | Unique peptides | Spectral count |     |             |      |         | Avg. Mass |
| A0A8C5RUN6                | 5               | 9              | 268 | 0.03358209  | 0.25 | HYD     | 30480     |
| A0A8C6X9A7                | 5               | 9              | 266 | 0.033834586 | 0.25 | house   | 30534     |
| A0A670Z4J3                | 4               | 7              | 508 | 0.013779528 | 0.10 | house   | 55607     |
| A0A8C6XYH4                | 2               | 5              | 193 | 0.025906736 | 0.19 | house   | 22033     |
| A0A8C6XXU9                | 2               | 5              | 239 | 0.020920502 | 0.16 | CRISP   | 26755     |
| A0A8C6XZL9                | 2               | 5              | 239 | 0.020920502 | 0.16 | CRISP   | 26822     |
| A0A8C6XXV5                | 2               | 5              | 239 | 0.020920502 | 0.16 | CRISP   | 26854     |
| A0A6B2F5Z9                | 2               | 6              | 486 | 0.012345679 | 0.09 | house   | 53578     |

| V8NCE3     | 2               | 5              | 450 | 0.011111111 | 0.08 | house | 51067     |
|------------|-----------------|----------------|-----|-------------|------|-------|-----------|
| A0A8C6XBU8 | 2               | 3              | 454 | 0.00660793  | 0.05 | house | 50316     |
| Q7T1K6     | 2               | 5              | 239 | 0.020920502 | 0.16 | CRISP | 26882     |
| F2Q6F2     | 2               | 4              | 239 | 0.016736402 | 0.12 | CRISP | 26688     |
| A0A223PK48 | 2               | 4              | 239 | 0.016736402 | 0.12 | CRISP | 27351     |
| A0A223PK22 | 2               | 4              | 257 | 0.015564202 | 0.12 | CRISP | 29388     |
| J9ZZN7     | 2               | 3              | 247 | 0.012145749 | 0.09 | house | 28165     |
| A0A6I9XF37 | 2               | 3              | 251 | 0.011952191 | 0.09 | house | 28634     |
| V8N8G6     | 2               | 1              | 360 | 0.002777778 | 0.02 | house | 40263     |
| Band 12    |                 |                |     |             |      |       |           |
| Accession  | Unique peptides | Spectral count |     |             |      |       | Avg. Mass |
| A0A8C6Y1Y2 | 4               | 26             | 239 | 0.108786611 | 0.81 | CRISP | 26985     |
| Q7T1K6     | 4               | 24             | 239 | 0.10041841  | 0.75 | CRISP | 26882     |
| Q7ZT98     | 4               | 22             | 239 | 0.092050209 | 0.69 | CRISP | 26869     |
| A0A8C6XYH4 | 4               | 8              | 193 | 0.041450777 | 0.31 | CRISP | 22033     |
| A0A8C6XXU9 | 3               | 17             | 239 | 0.071129707 | 0.53 | CRISP | 26755     |
| A0A8C6XZL9 | 3               | 17             | 239 | 0.071129707 | 0.53 | CRISP | 26822     |
| A0A8C6XXV5 | 3               | 17             | 239 | 0.071129707 | 0.53 | CRISP | 26854     |
| A0A8C5RUN6 | 3               | 6              | 268 | 0.02238806  | 0.17 | HYD   | 30480     |
| A0A8C6X9A7 | 3               | 5              | 266 | 0.018796992 | 0.14 | house | 30534     |
| C1JZW4     | 2               | 5              | 237 | 0.021097046 | 0.16 | CRISP | 26305     |
| F2Q6G2     | 2               | 5              | 238 | 0.021008403 | 0.16 | CRISP | 26458     |
| F2Q6G3     | 2               | 5              | 238 | 0.021008403 | 0.16 | CRISP | 26443     |
| V8NKT2     | 2               | 5              | 244 | 0.020491803 | 0.15 | CRISP | 27268     |
| Band 13    |                 |                |     |             |      |       |           |
| Accession  | Unique peptides | Spectral count |     |             |      |       | Avg. Mass |
| A0A8C6XYH4 | 4               | 4              | 193 | 0.020725389 | 0.15 | CRISP | 22033     |
| Band 14    |                 |                |     |             |      |       |           |
| Accession  | Unique peptides | Spectral count |     |             |      |       | Avg. Mass |
| P61899     | 2               | 8              | 116 | 0.068965517 | 0.51 | NGF   | 13064     |
| Q5YF89     | 2               | 8              | 241 | 0.033195021 | 0.25 | NGF   | 27030     |
| P82885     | 2               | 2              | 108 | 0.018518519 | 0.14 | VESP  | 12038     |
| P83234     | 2               | 2              | 190 | 0.010526316 | 0.08 | CRISP | 21174     |
| A0A8C6VC33 | 2               | 2              | 204 | 0.009803922 | 0.07 | VESP  | 22638     |
| A0A182C6D0 | 2               | 2              | 213 | 0.009389671 | 0.07 | VESP  | 23498     |
| A0A098LWX5 | 2               | 2              | 216 | 0.009259259 | 0.07 | VESP  | 24116     |
| A0A8C5RJP3 | 2               | 2              | 218 | 0.009174312 | 0.07 | VESP  | 24380     |
| V8NEU2     | 2               | 2              | 220 | 0.009090909 | 0.07 | VESP  | 24506     |
| V9I168     | 2               | 3              | 243 | 0.012345679 | 0.09 | NGF   | 27284     |
| Band 15    |                 |                |     |             |      |       |           |
| Accession  | Unique peptides | Spectral count |     |             |      |       | Avg. Mass |

| P82885     | 9               | 11             | 108 | 0.101851852 | 0.76 | VESP  | 12038     |
|------------|-----------------|----------------|-----|-------------|------|-------|-----------|
| A0A8C6VC33 | 9               | 11             | 204 | 0.053921569 | 0.40 | VESP  | 22638     |
| P61899     | 3               | 6              | 116 | 0.051724138 | 0.39 | NGF   | 13064     |
| Q5YF89     | 3               | 7              | 241 | 0.029045643 | 0.22 | NGF   | 27030     |
| P00601     | 3               | 5              | 119 | 0.042016807 | 0.31 | PLA2  | 13360     |
| P00600     | 2               | 5              | 119 | 0.042016807 | 0.31 | PLA2  | 13427     |
| V8NRX1     | 2               | 2              | 462 | 0.004329004 | 0.03 | house | 51876     |
| A0A8C6X610 | 2               | 2              | 483 | 0.004140787 | 0.03 | house | 53183     |
| A0A6B2F5Z9 | 2               | 2              | 486 | 0.004115226 | 0.03 | house | 53578     |
| P01456     | 2               | 5              | 60  | 0.083333333 | 0.62 | 3FTx  | 6697      |
| P01455     | 2               | 5              | 60  | 0.083333333 | 0.62 | 3FTx  | 6696      |
| Band 16    |                 |                |     |             |      |       |           |
| Accession  | Unique peptides | Spectral count |     |             |      |       | Avg. Mass |
| P01456     | 3               | 9              | 60  | 0.15        | 1.12 | 3FTx  | 6697      |
| P01455     | 3               | 9              | 60  | 0.15        | 1.12 | 3FTx  | 6696      |
| V8NRX1     | 3               | 2              | 462 | 0.004329004 | 0.03 | house | 51876     |
| A0A8C6X610 | 3               | 2              | 483 | 0.004140787 | 0.03 | house | 53183     |
| A0A6B2F5Z9 | 3               | 2              | 486 | 0.004115226 | 0.03 | house | 53578     |
| A0A670Z4J3 | 2               | 2              | 508 | 0.003937008 | 0.03 | house | 55607     |
| P01462     | 2               | 15             | 60  | 0.25        | 1.86 | 3FTx  | 6858      |
| P01464     | 2               | 15             | 60  | 0.25        | 1.86 | 3FTx  | 6856      |
| P01465     | 2               | 15             | 60  | 0.25        | 1.86 | 3FTx  | 6857      |
| Band 17    |                 |                |     |             |      |       |           |
| Accession  | Unique peptides | Spectral count |     |             |      |       | Avg. Mass |
| P01453     | 4               | 37             | 60  | 0.616666667 | 4.59 | 3FTx  | 6682      |
| P01456     | 3               | 39             | 60  | 0.65        | 4.84 | 3FTx  | 6697      |
| P01390     | 3               | 7              | 71  | 0.098591549 | 0.73 | 3FTx  | 7902      |
| P01462     | 2               | 40             | 60  | 0.666666667 | 4.96 | 3FTx  | 6858      |
| P01465     | 2               | 40             | 60  | 0.666666667 | 4.96 | 3FTx  | 6857      |
| P01463     | 2               | 38             | 60  | 0.633333333 | 4.72 | 3FTx  | 6871      |
| P25674     | 2               | 7              | 71  | 0.098591549 | 0.73 | 3FTx  | 7821      |
| P01458     | 2               | 11             | 60  | 0.183333333 | 1.36 | 3FTx  | 6791      |
| P01400     | 2               | 6              | 65  | 0.092307692 | 0.69 | 3FTx  | 7430      |
| P00986     | 2               | 3              | 57  | 0.052631579 | 0.39 | KUN   | 6466      |
| A0A6B2F5Z9 | 2               | 3              | 486 | 0.00617284  | 0.05 | house | 53578     |
| V8NRX1     | 2               | 3              | 462 | 0.006493506 | 0.05 | house | 51876     |
| A0A8C6X610 | 2               | 3              | 483 | 0.00621118  | 0.05 | house | 53183     |
| P01460     | 2               | 11             | 60  | 0.183333333 | 1.36 | 3FTx  | 6812      |
| P01459     | 2               | 11             | 60  | 0.183333333 | 1.36 | 3FTx  | 6839      |
| A0A670Z4J3 | 2               | 3              | 508 | 0.005905512 | 0.04 | house | 55607     |
| P01421     | 2               | 1              | 61  | 0.016393443 | 0.12 | 3FTx  | 6913      |
| POC547     | 2               | 2              | 21  | 0.095238095 | 0.71 | 3FTx  | 2400      |

| Band 18    |                 |                |     |             |      |         |           |
|------------|-----------------|----------------|-----|-------------|------|---------|-----------|
| Accession  | Unique peptides | Spectral count |     |             |      |         | Avg. Mass |
| P82885     | 2               | 2              | 108 | 0.018518519 | 0.14 | VESP    | 12038     |
| P83234     | 2               | 2              | 190 | 0.010526316 | 0.08 | CRISP   | 21174     |
| A0A8C6VC33 | 2               | 2              | 204 | 0.009803922 | 0.07 | VESP    | 22638     |
| A0A182C6D0 | 2               | 2              | 213 | 0.009389671 | 0.07 | CRISP   | 23498     |
| A0A098LWX5 | 2               | 2              | 216 | 0.009259259 | 0.07 | VESP    | 24116     |
| A0A8C5RJP3 | 2               | 2              | 218 | 0.009174312 | 0.07 | VESP    | 24380     |
| V8NEU2     | 2               | 2              | 220 | 0.009090909 | 0.07 | VESP    | 24506     |
| A0A8C6X9A7 | 2               | 2              | 266 | 0.007518797 | 0.06 | house   | 30534     |
| A0A8C5RUN6 | 2               | 2              | 268 | 0.007462687 | 0.06 | HYD     | 30480     |
| A0A6J1W1H3 | 2               | 2              | 274 | 0.00729927  | 0.05 | house   | 31377     |
| U3FCT9     | 2               | 2              | 274 | 0.00729927  | 0.05 | house   | 31577     |
| A0A670ZLF7 | 2               | 2              | 274 | 0.00729927  | 0.05 | house   | 31175     |
| A0A6J1VT72 | 2               | 2              | 288 | 0.006944444 | 0.05 | house   | 33047     |
| Band 19    |                 |                |     |             |      |         |           |
| Accession  | Unique peptides | Spectral count |     |             |      |         | Avg. Mass |
| P01453     | 4               | 31             | 60  | 0.516666667 | 3.85 | 3FTx    | 6682      |
| P01454     | 3               | 29             | 60  | 0.483333333 | 3.60 | 3FTx    | 6669      |
| P01456     | 3               | 34             | 60  | 0.566666667 | 4.22 | 3FTx    | 6697      |
| P01390     | 2               | 7              | 71  | 0.098591549 | 0.73 | 3FTx    | 7902      |
| P01462     | 2               | 32             | 60  | 0.533333333 | 3.97 | 3FTx    | 6858      |
| P01465     | 2               | 32             | 60  | 0.533333333 | 3.97 | 3FTx    | 6857      |
| P01463     | 2               | 29             | 60  | 0.483333333 | 3.60 | 3FTx    | 6871      |
| P01458     | 2               | 12             | 60  | 0.2         | 1.49 | 3FTx    | 6791      |
| P25674     | 2               | 7              | 71  | 0.098591549 | 0.73 | 3FTx    | 7821      |
| V8NTL3     | 2               | 4              | 126 | 0.031746032 | 0.24 | house   | 13507     |
| V8NSM1     | 2               | 4              | 129 | 0.031007752 | 0.23 | house   | 13855     |
| A0A8C6X0T5 | 2               | 4              | 149 | 0.026845638 | 0.20 | house   | 15926     |
| P00986     | 2               | 4              | 57  | 0.070175439 | 0.52 | KUN     | 6466      |
| P01400     | 2               | 6              | 65  | 0.092307692 | 0.69 | 3FTx    | 7430      |
| A0A6B2F5Z9 | 2               | 2              | 486 | 0.004115226 | 0.03 | house   | 53578     |
| V8NRX1     | 2               | 2              | 462 | 0.004329004 | 0.03 | house   | 51876     |
| A0A8C6X610 | 2               | 2              | 483 | 0.004140787 | 0.03 | house   | 53183     |
| A0A8C6XFH6 | 2               | 6              | 81  | 0.074074074 | 0.55 | unknown | 9071      |
| A0A0U5ARS4 | 2               | 5              | 72  | 0.069444444 | 0.52 | 3FTx    | 7959      |
| A0A8C6XFM5 | 2               | 5              | 81  | 0.061728395 | 0.46 | unknown | 8945      |
| P01460     | 2               | 9              | 60  | 0.15        | 1.12 | 3FTx    | 6812      |
| P01459     | 2               | 9              | 60  | 0.15        | 1.12 | 3FTx    | 6839      |
| D6RUZ0     | 2               | 2              | 233 | 0.008583691 | 0.06 | house   | 25972     |
| A0A8C5S8V5 | 2               | 2              | 332 | 0.006024096 | 0.04 | house   | 37341     |
| V8N8G6     | 2               | 2              | 360 | 0.005555556 | 0.04 | house   | 40263     |



| A0A8C6VAB1                | 2                  | 2              | 375 | 0.005333333 | 0.04 | house | 41793        |
|---------------------------|--------------------|----------------|-----|-------------|------|-------|--------------|
| A0A670YBF6                | 2                  | 2              | 375 | 0.005333333 | 0.04 | house | 41737        |
| A0A8C5SDB1                | 2                  | 2              | 378 | 0.005291005 | 0.04 | house | 42008        |
| A0A6J1VWC1                | 2                  | 2              | 389 | 0.005141388 | 0.04 | house | 43133        |
| A0A8C6XB43                | 2                  | 2              | 450 | 0.004444444 | 0.03 | house | 49843        |
| Band 20                   |                    |                |     |             |      |       |              |
| no hits > 1<br>unique pep |                    |                |     |             |      |       |              |
| Band 21                   |                    |                |     |             |      |       |              |
| Accession                 | Unique<br>peptides | Spectral count |     |             |      |       | Avg.<br>Mass |
| Q5DK65                    | 2                  | 2              | 220 | 0.009090909 | 0.07 | house | 24743        |
| Q5DK66                    | 2                  | 2              | 224 | 0.008928571 | 0.07 | house | 25203        |
| A0A8C5S8V5                | 2                  | 2              | 332 | 0.006024096 | 0.04 | house | 37341        |
| V8N8G6                    | 2                  | 2              | 360 | 0.005555556 | 0.04 | house | 40263        |
| U3FXK3                    | 2                  | 2              | 375 | 0.005333333 | 0.04 | house | 41737        |
| A0A8C6VAB1                | 2                  | 2              | 375 | 0.005333333 | 0.04 | house | 41793        |
| A0A8C5SDB1                | 2                  | 2              | 378 | 0.005291005 | 0.04 | house | 42008        |
| A0A8C5SAH1                | 2                  | 2              | 396 | 0.005050505 | 0.04 | house | 43793        |
| A0A8C6XB43                | 2                  | 2              | 450 | 0.004444444 | 0.03 | house | 49843        |
| A0A6B2F5Z9                | 2                  | 2              | 486 | 0.004115226 | 0.03 | house | 53578        |
| V8NRX1                    | 2                  | 2              | 462 | 0.004329004 | 0.03 | house | 51876        |
| A0A8C6X610                | 2                  | 2              | 483 | 0.004140787 | 0.03 | house | 53183        |
| A0A670Z4J3                | 2                  | 3              | 508 | 0.005905512 | 0.04 | house | 55607        |
| A0A8C6XKE6                | 2                  | 3              | 109 | 0.027522936 | 0.20 | PLA2  | 11921        |
| A0A8C6XK26                | 2                  | 3              | 109 | 0.027522936 | 0.20 | PLA2  | 11992        |
| A4FS04                    | 2                  | 3              | 119 | 0.025210084 | 0.19 | PLA2  | 13188        |
| P25498                    | 2                  | 3              | 119 | 0.025210084 | 0.19 | PLA2  | 13229        |
| Band 22                   |                    |                |     |             |      |       |              |
| Accession                 | Unique<br>peptides | Spectral count |     |             |      |       | Avg.<br>Mass |
| P01456                    | 3                  | 8              | 60  | 0.133333333 | 0.99 | 3FTx  | 6697         |
| P01455                    | 3                  | 8              | 60  | 0.133333333 | 0.99 | 3FTx  | 6696         |
| P01454                    | 3                  | 5              | 60  | 0.083333333 | 0.62 | 3FTx  | 6669         |
| P01453                    | 3                  | 5              | 60  | 0.083333333 | 0.62 | 3FTx  | 6682         |
| V8NRX1                    | 3                  | 2              | 462 | 0.004329004 | 0.03 | house | 51876        |
| A0A8C6X610                | 2                  | 2              | 483 | 0.004140787 | 0.03 | house | 53183        |
| A0A6B2F5Z9                | 2                  | 2              | 486 | 0.004115226 | 0.03 | house | 53578        |
| A0A670Z4J3                | 2                  | 2              | 508 | 0.003937008 | 0.03 | house | 55607        |
| A0A8C5S523                | 2                  | 2              | 460 | 0.004347826 | 0.03 | house | 50716        |
| A0A8C5WTY5                | 2                  | 2              | 463 | 0.004319654 | 0.03 | house | 51349        |
